# Supplementary material
Source: PubMed Central journal article supplement (PMC3638539)
Supplement: Supp_Figure1.pdf [file Supp_Figure1.pdf]

## Supplementary Data

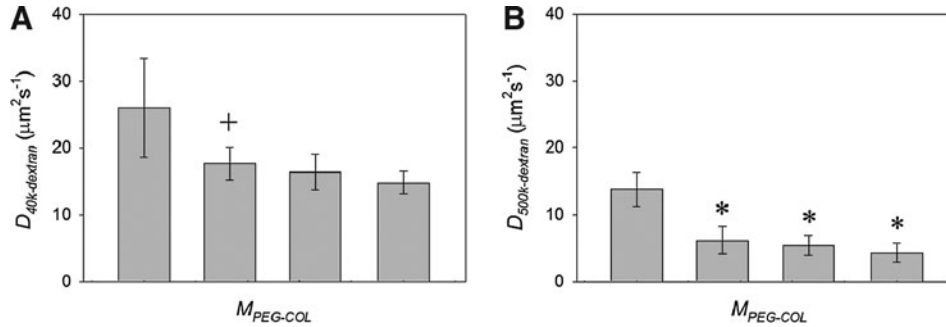

**SUPPLEMENTARY FIG. S1.** Diffusion coefficients ( $D_{dextran}$ ) of Fluorescein isothiocyanate-dextran with molecular weights of 40 kDa (A) and 500 kDa (B) determined by fluorescence recovery after photobleaching assay. The dextran was encapsulated into collagen-poly(ethylene glycol) dissuccinimidyl ester (PEGDE) gels with varying mass ratio between PEGDE and collagen ( $M_{PEG-COL}$ ). (A) Effect of  $M_{PEG-COL}$  on  $D_{40k-dextran}$ . The difference between  $D_{40k-dextran}$  at an  $M_{PEG-COL}$  of 0 and  $D_{40k-dextran}$  at an  $M_{PEG-COL}$  of 0.33 is not statistically significant ( $+p > 0.05$ ). (B) Effect of  $M_{PEG-COL}$  on  $D_{500k-dextran}$ . In contrast, the difference between  $D_{500k-dextran}$  at an  $M_{PEG-COL}$  of 0 and  $D_{500k-dextran}$  at an  $M_{PEG-COL}$  of 0.33 is statistically significant ( $*p < 0.05$ ). However, there is not a statistical significance of the differences among  $D_{500k-dextran}$  at  $M_{PEG-COL}$  of 0.33, 0.66, and 1.0.
