# Supplementary material
Source: PubMed Central journal article supplement (PMC3638539)
Supplement: Supp_Figure2.pdf [file Supp_Figure2.pdf]

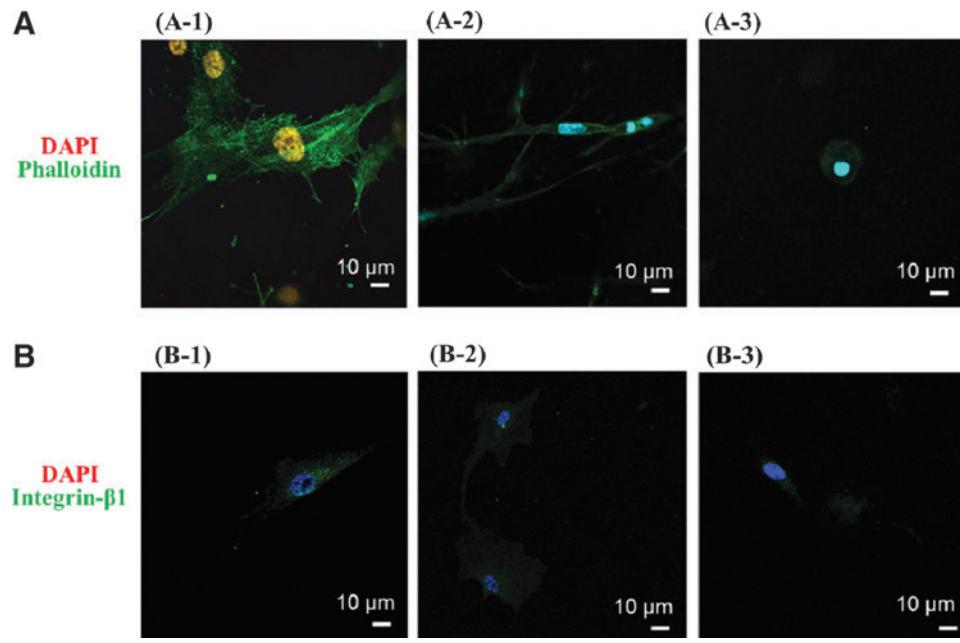

**SUPPLEMENTARY FIG. S2.** (A) Fluorescence immunostaining images of cell nucleus (blue color) and intracellular actin (green color) of human dermal fibroblasts (HDFs) in the hydrogels with varied elastic moduli ( $E$ ) of 0.7 (A-1), 1.6 (A-2), and 2.2 kPa (A-3) at 14 days after culture. (B) Fluorescence immunostaining images of cellular  $\beta$ 1 integrin expression (green color) and cell nucleus (blue color) in the hydrogels with varied  $E$  of 0.7 (B-1), 1.6 (B-2), 2.2 (B-3) at 14 days after culture.
