# Supplementary material
Source: PubMed Central journal article supplement (PMC3638539)
Supplement: Supp_Figure3.pdf [file Supp_Figure3.pdf]

Right after encapsulation

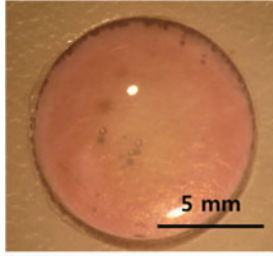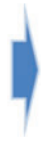

14 days after culture

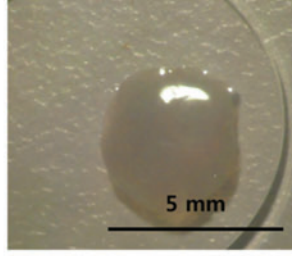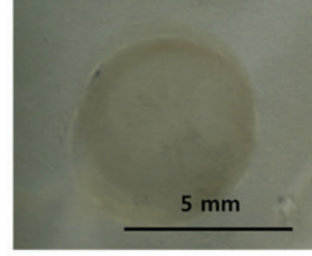

(1) In a collagen hydrogel (2) In a collagen-PEGDE hydrogel

**SUPPLEMENTARY FIG. S3.** Images of the cell-encapsulated collagen gels that undergo shrinkage through 14 days of cell culture.
