# Supplementary material
Source: PubMed Central journal article supplement (PMC3638539)
Supplement: Supp_Figure4.pdf [file Supp_Figure4.pdf]

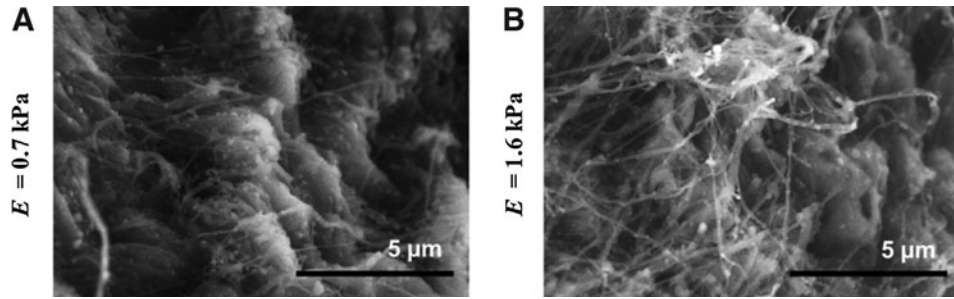

**SUPPLEMENTARY FIG. S4.** Scanning electron microscopic (SEM) images of the cross section of HDF-encapsulating hydrogels with varied  $E$  of 0.7 (A) and 1.6 kPa (B). The images were captured after 7 days of cell culture in the hydrogel. Both of two gels displayed interconnected collagen fibers in which the HDFs were entrapped.
