# Supplementary material
Source: PubMed Central journal article supplement (PMC3638539)
Supplement: Supp_Figure5.pdf [file Supp_Figure5.pdf]

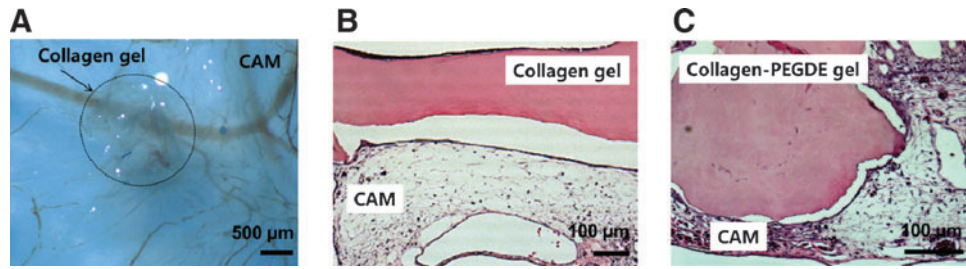

**SUPPLEMENTARY FIG. S5.** Implantation of the collagen hydrogels without HDFs did not stimulate any inflammatory response and or generate blood vessel production. **(A)** Top view of an implant on chorioallantoic membrane (CAM). Cross sections of the implants of the collagen hydrogel **(B)** and the collagen-hydrogel **(C)** stained with hematoxylin and eosin (H&E), respectively.
