# Supplementary material
Source: PubMed Central journal article supplement (PMC3638539)
Supplement: Supp_Figure6.pdf [file Supp_Figure6.pdf]

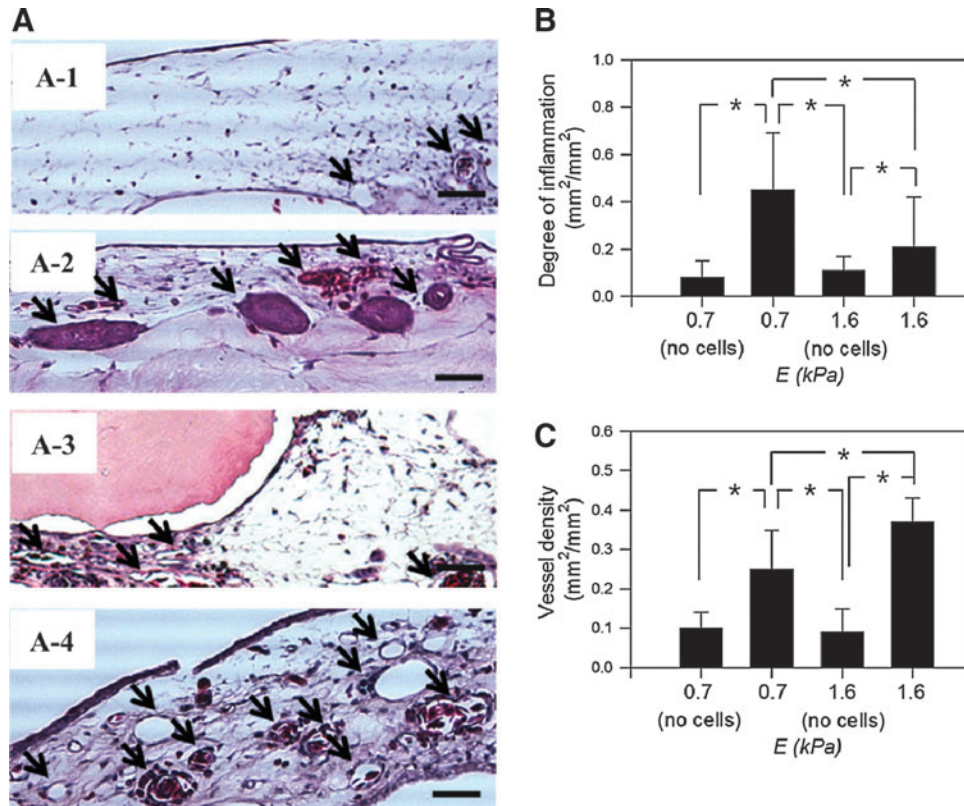

**SUPPLEMENTARY FIG. S6.** Histological analysis of neovascularization. **(A)** Cross sections of CAM stained by H&E. A-1: CAM implanted with the HDF-free collagen gel, A-2: with the HDF-encapsulating collagen gel, A-3: with the HDF-free collagen-PEGDE gel, A-4: with HDF-encapsulating collagen-PEGDE gel. The arrows indicate the blood vessels. **(B)** The HDF-encapsulating collagen gel stimulated host inflammation, while the HDF-free collagen gel and collagen-PEGDE, and the HDF-encapsulating collagen-PEGDE gel minimally stimulated it, as evidenced by the larger area of inflammation at the implantation site. **(C)** Implantation of the HDF-encapsulating collagen-PEGDE gel with an elastic modulus (*E*) of 1.6 kPa resulted in the larger blood vessel density of the CAM than the HDF-free collagen and collagen-PEGDE gel, and the HDF-encapsulating collagen gel with *E* of 0.7 kPa. Statistical significance between conditions ( $*p < 0.05$ ).
